# Supplementary material
Source: MDPI journal article supplement (https://www.mdpi.com/2073-4344/12/12/1638)

# Supplementary Materials

## Table of contents:

1. Figure S1:  $^1\text{H}$  NMR of 4-hydroxyphenylacetic acid **6b**
2. Figure S2:  $^{13}\text{C}$  NMR of 4-hydroxyphenylacetic acid **6b**
3. Figure S3: ESI-MS of 4-hydroxyphenylacetic acid **6b**
4. Figure S4: MS spectra of phenylacetic acid methyl ester **12**
5. Figure S5: MS spectra of phenylethanol **5a**
6. Figure S6: MS spectra of 4-hydroxyphenylacetic acid methyl ester **15**
7. Figure S7: MS spectra of methyl anthranilate **9**
8. Figure S8: MS spectra of indole-3-lactic acid methyl ester **17**
9. Figure S9: MS spectra of 3-indole acetic acid methyl ester **18**

## Figure S1

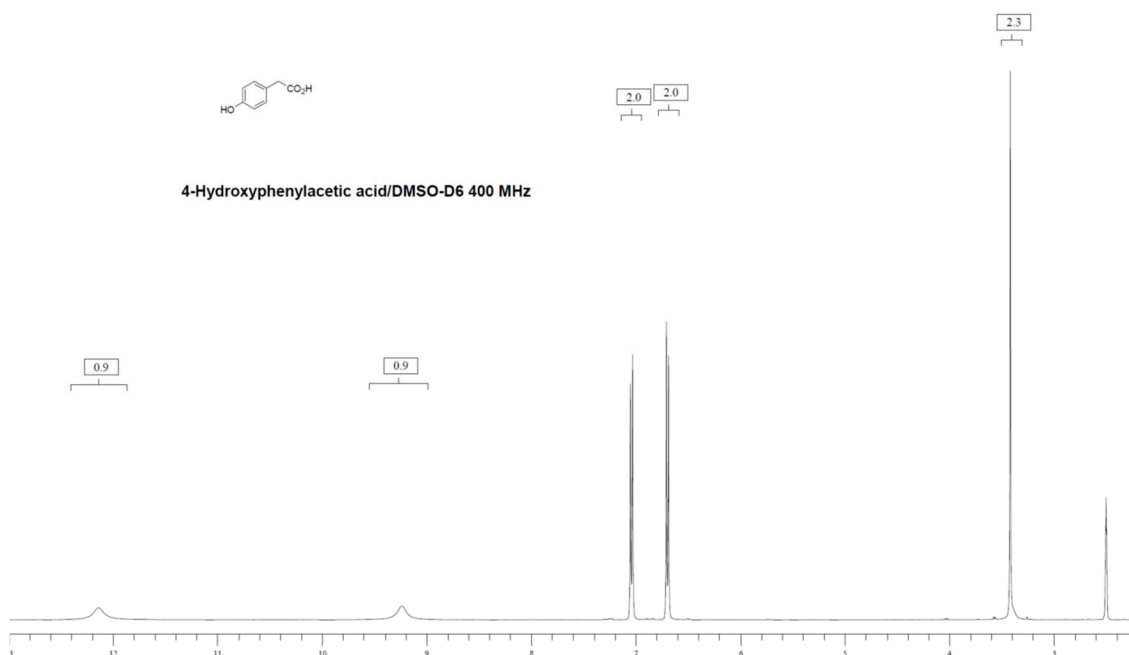

**Figure S2**

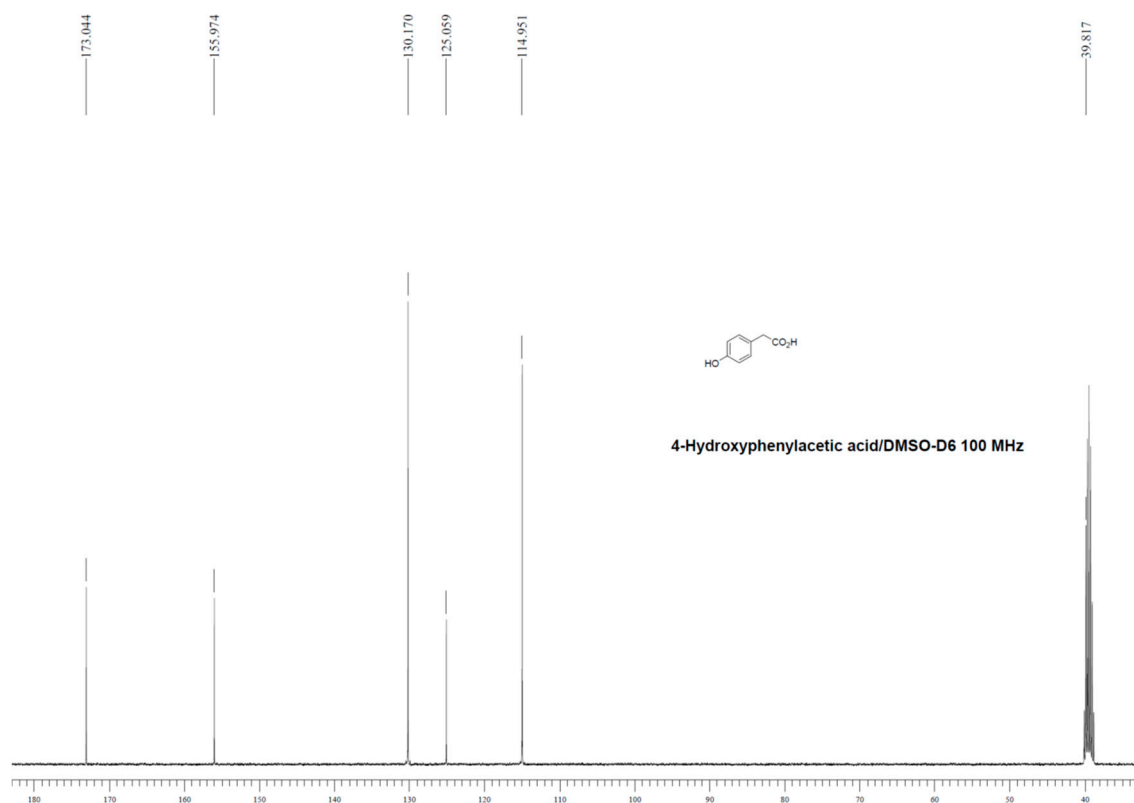

**Figure S3**

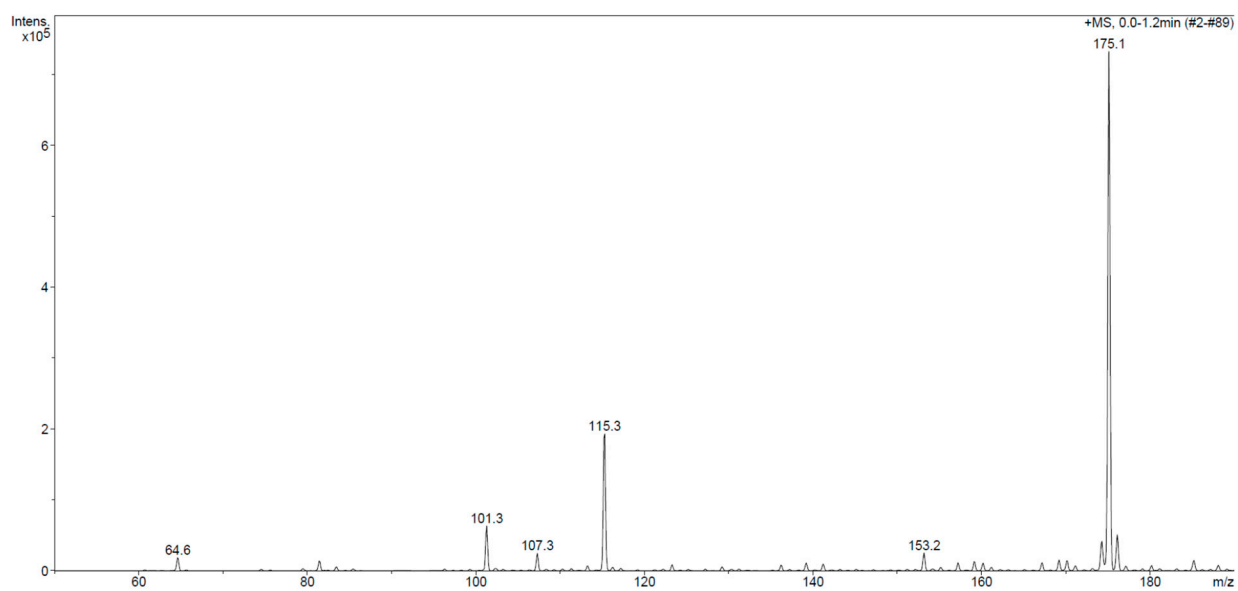

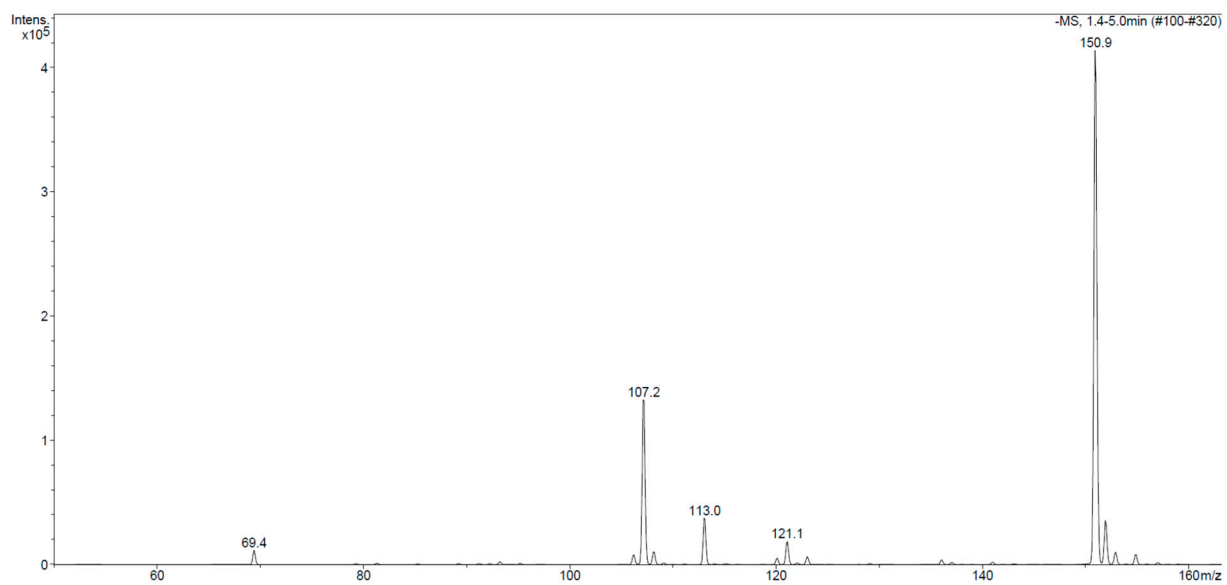

Figure S4

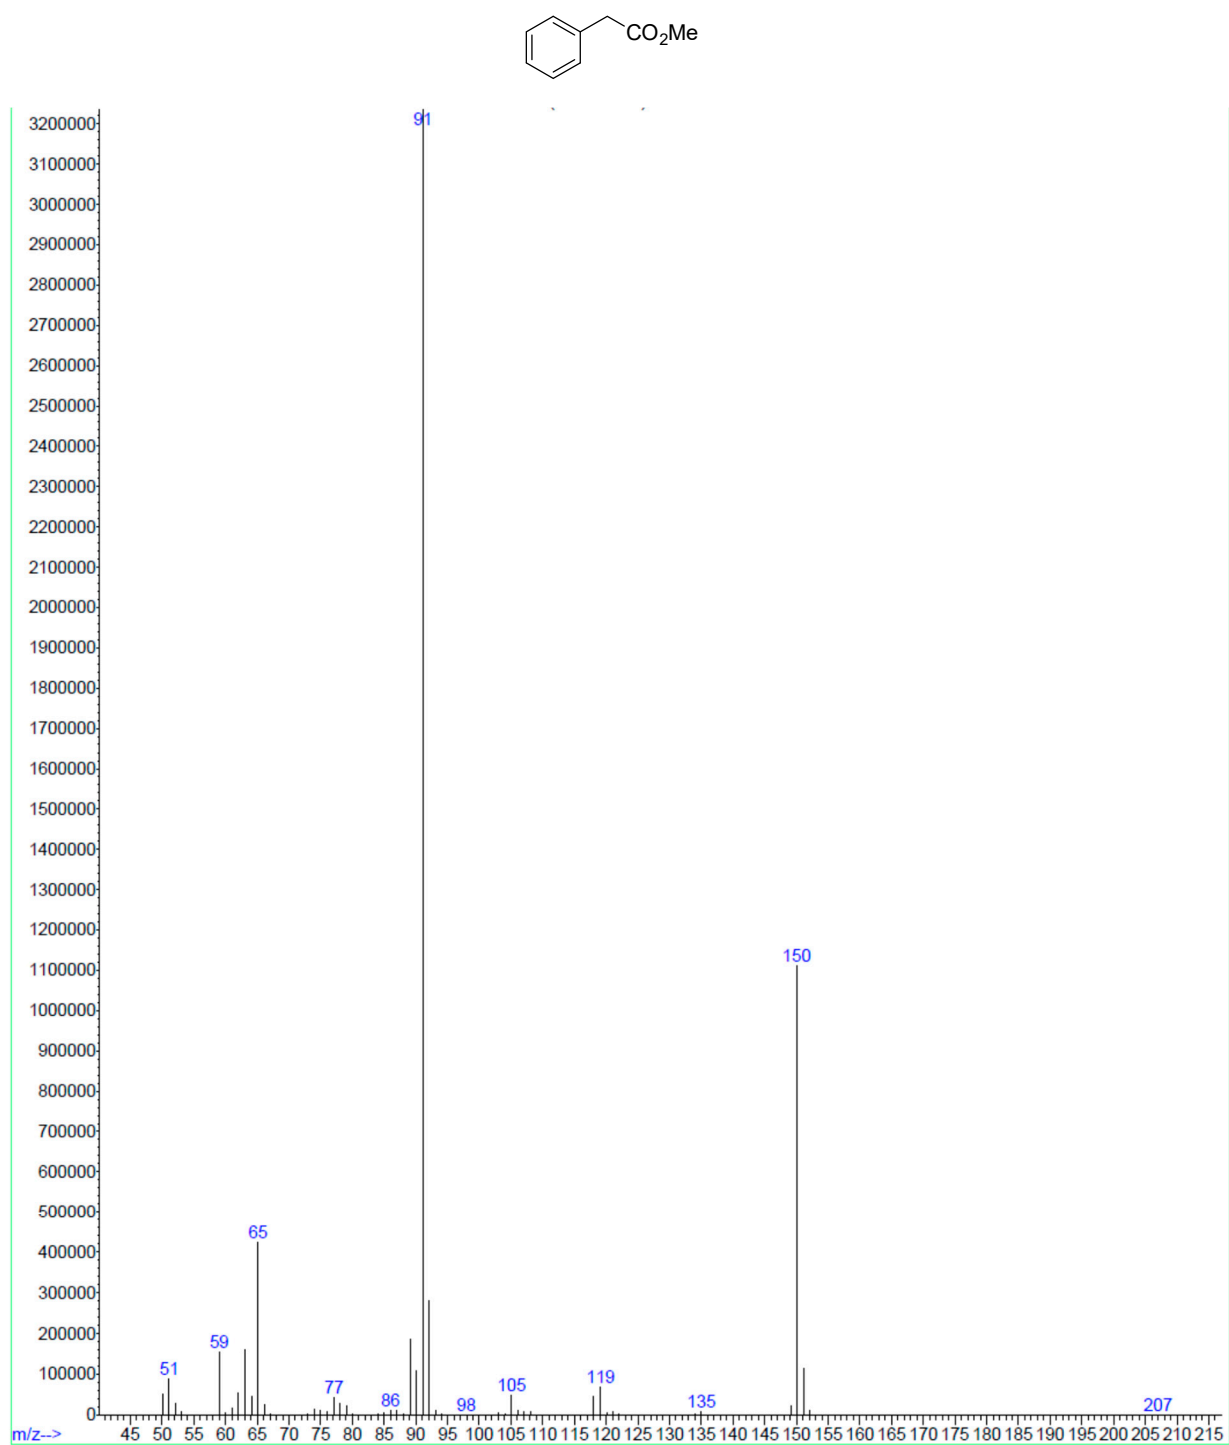

Figure S5

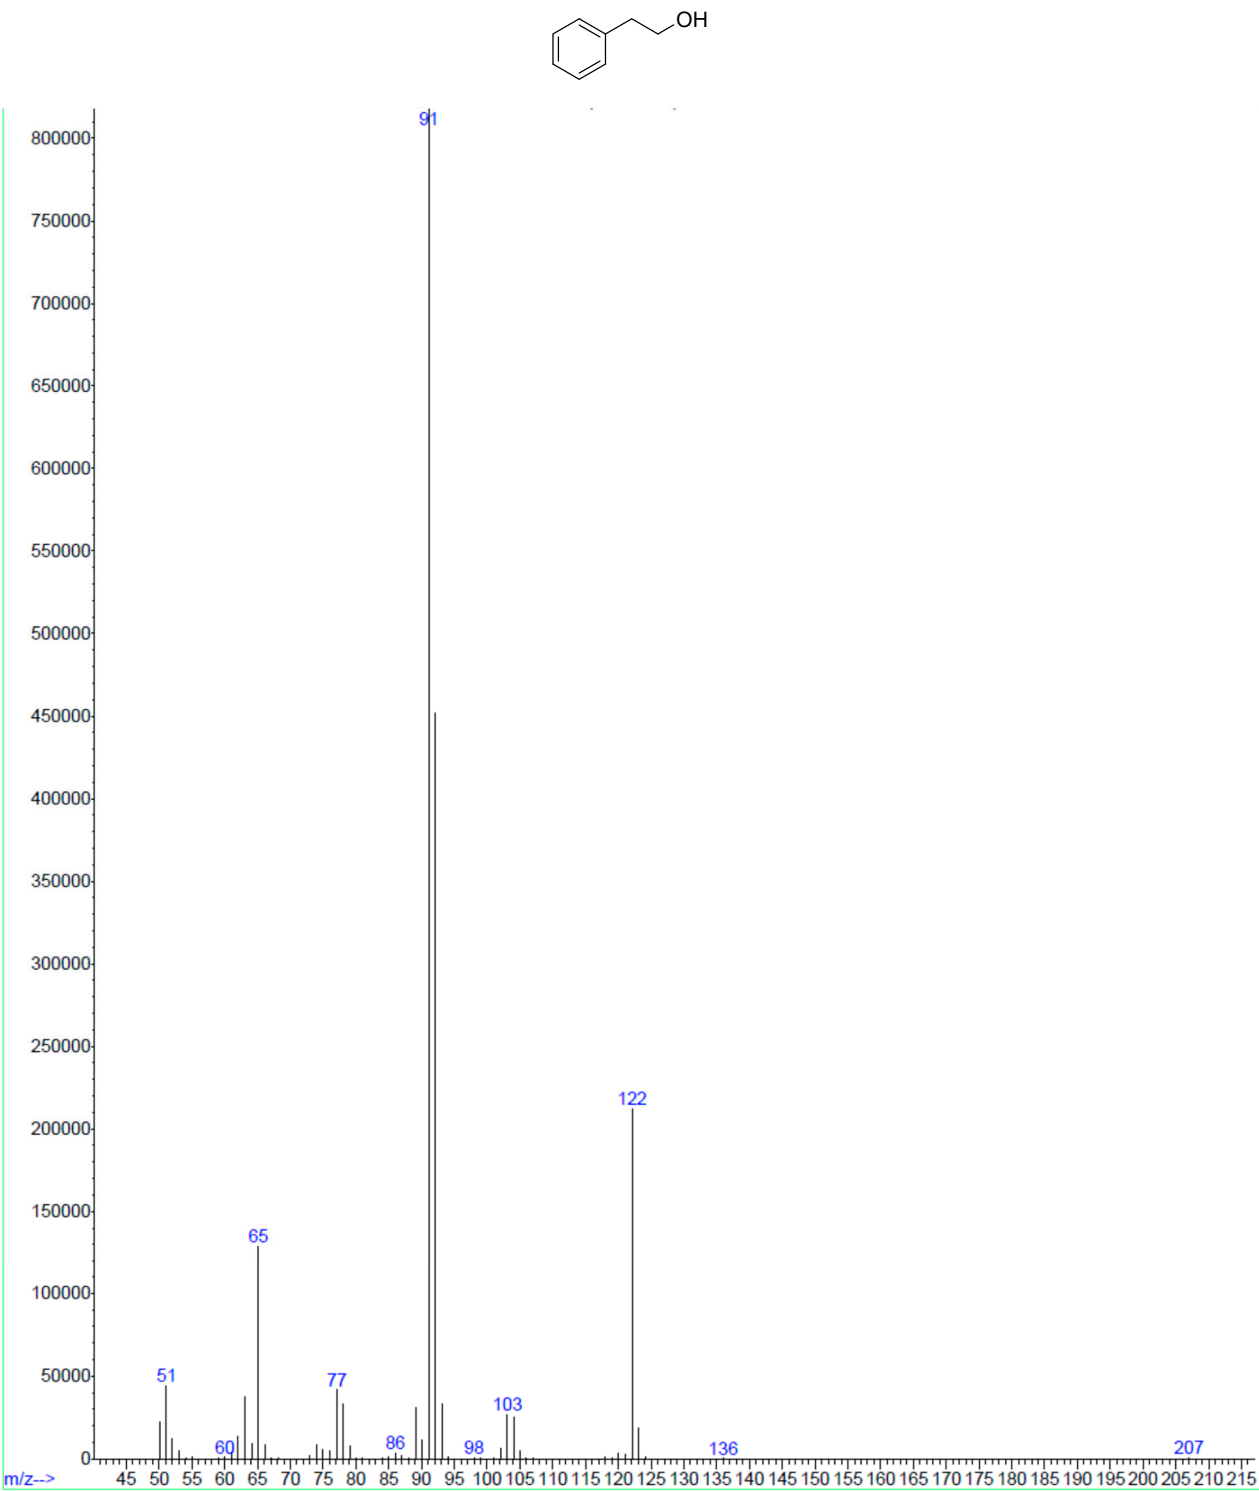

Figure S6

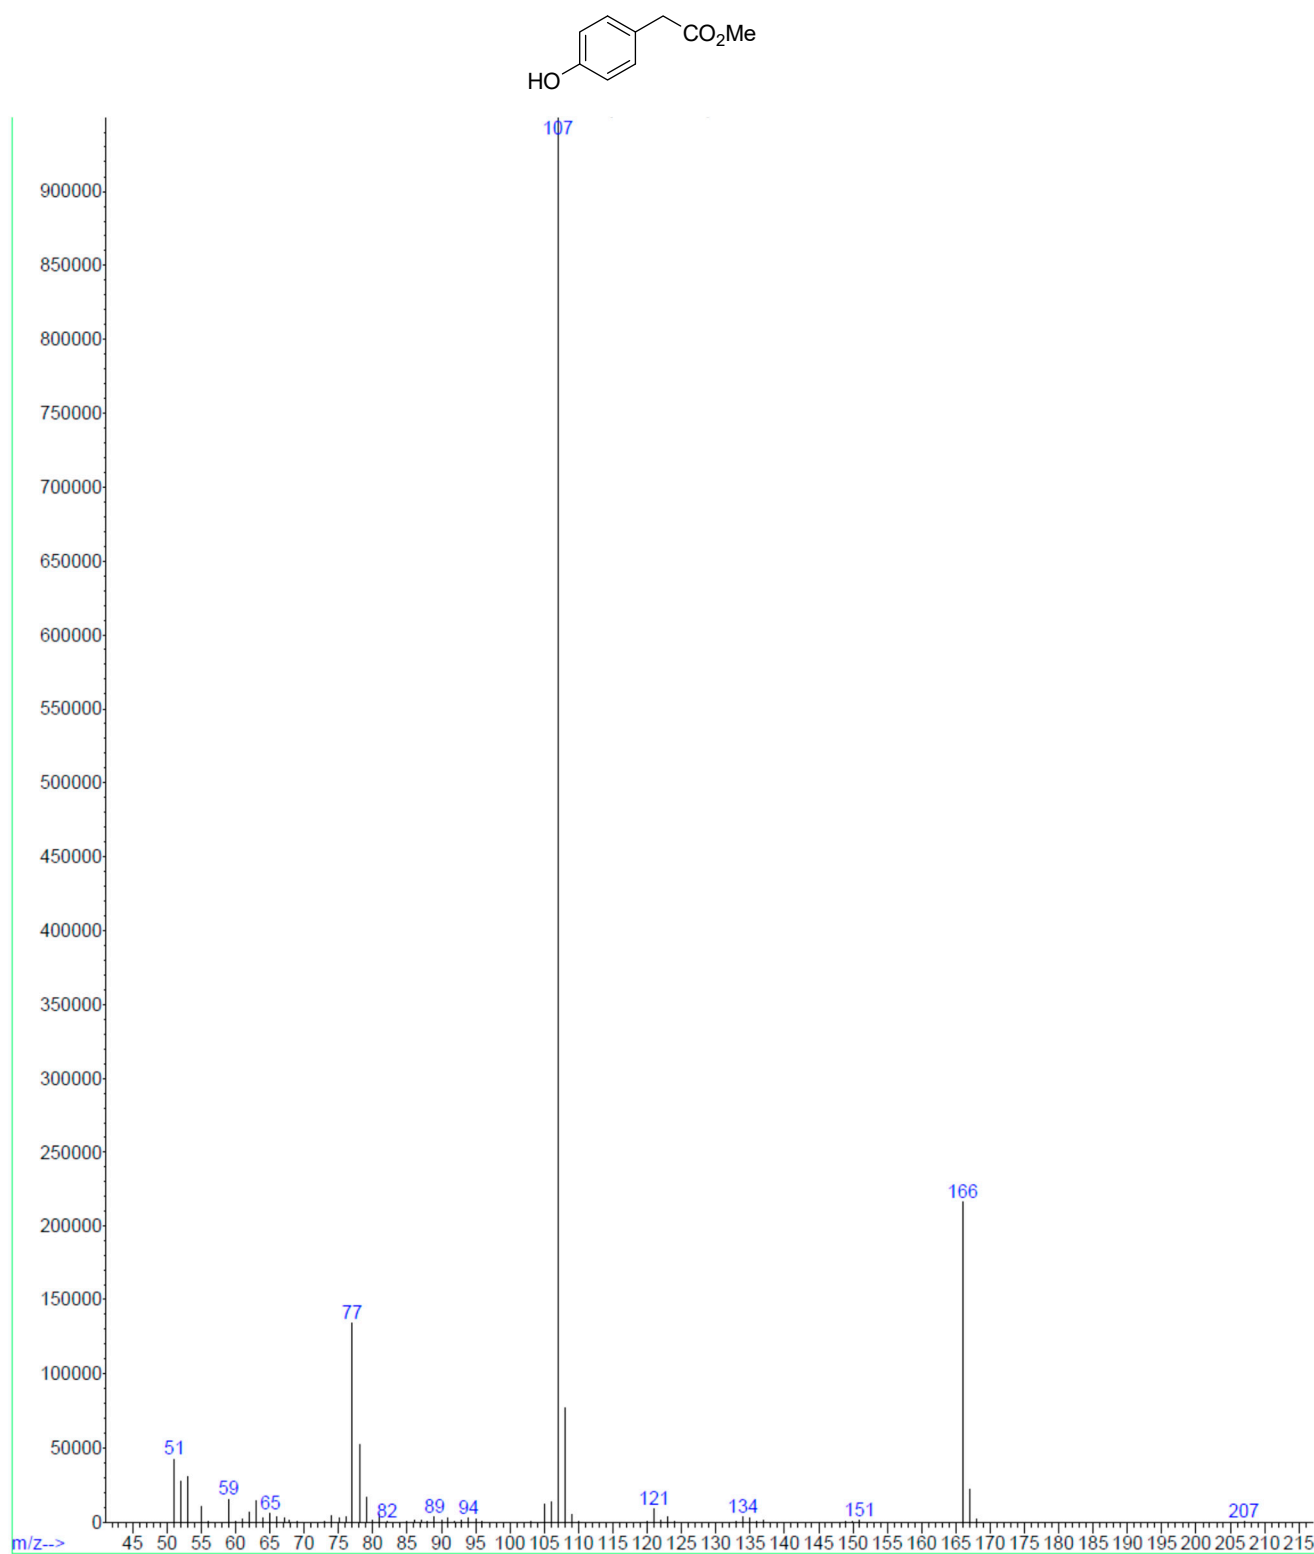

Figure S7

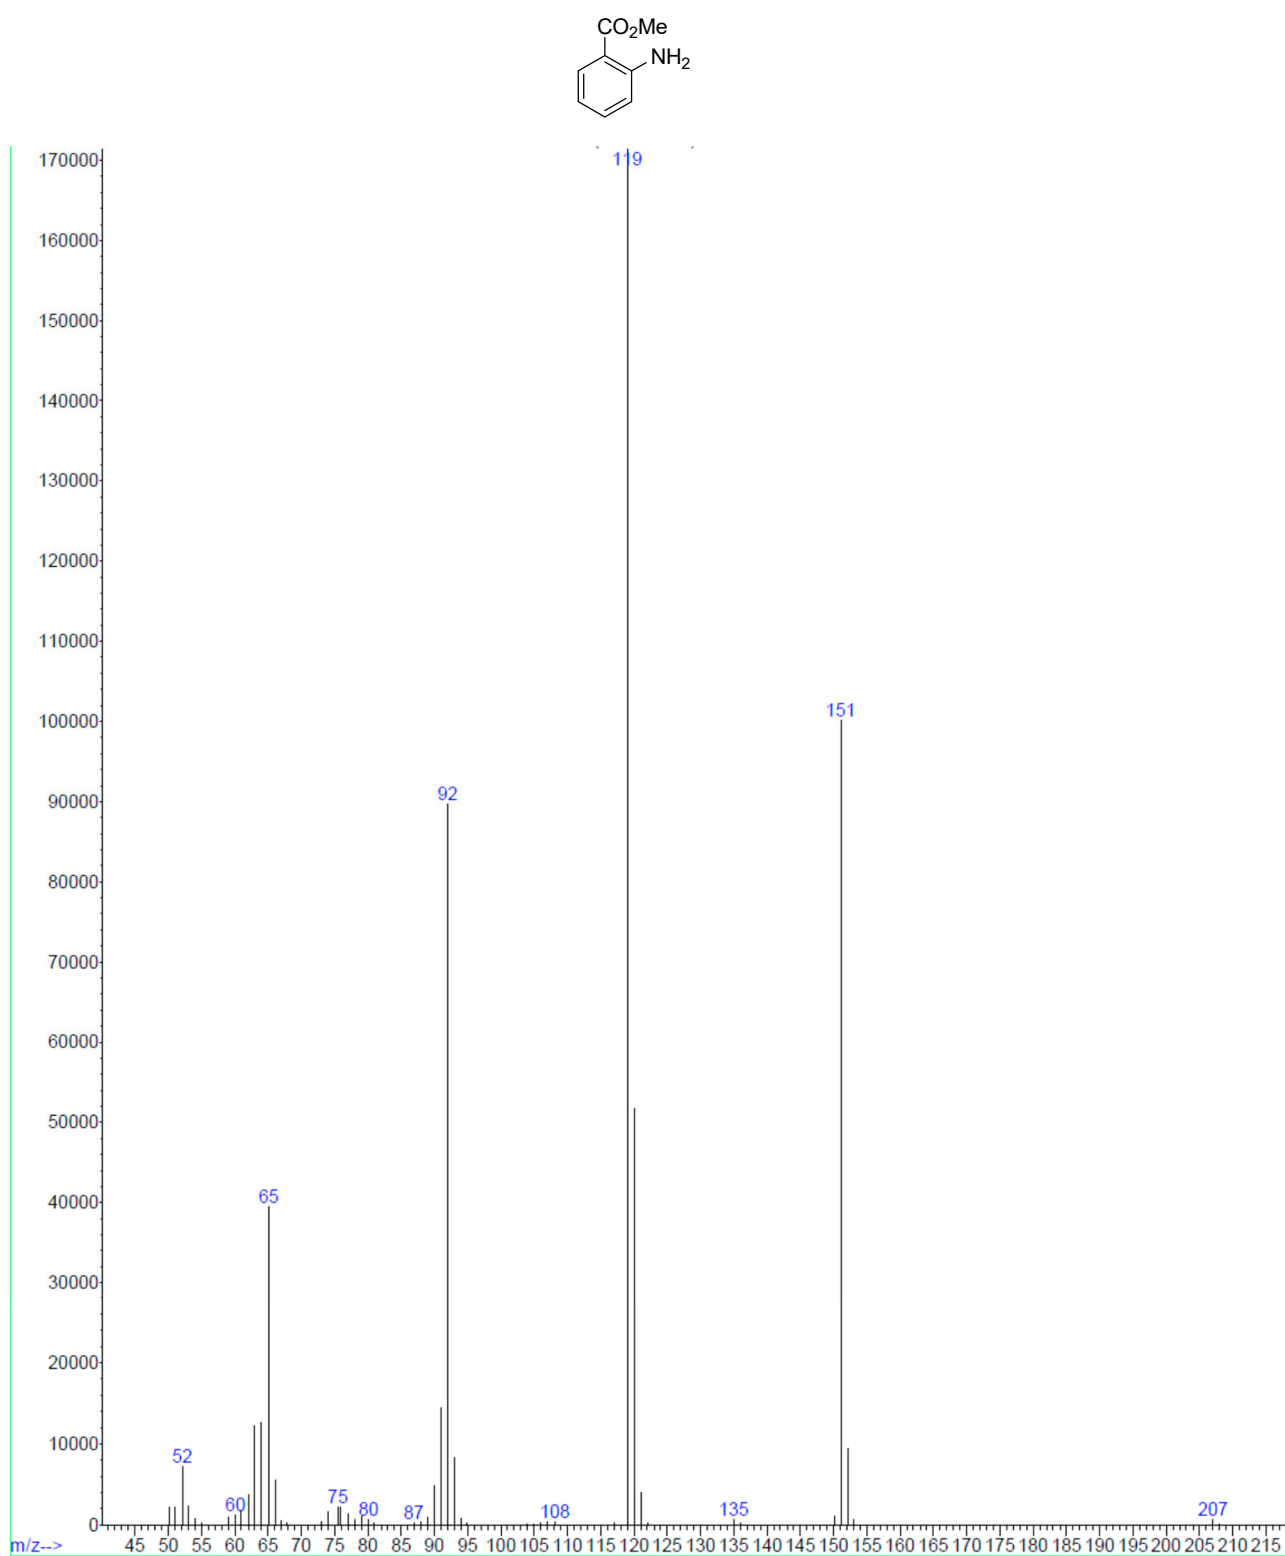

Figure S8

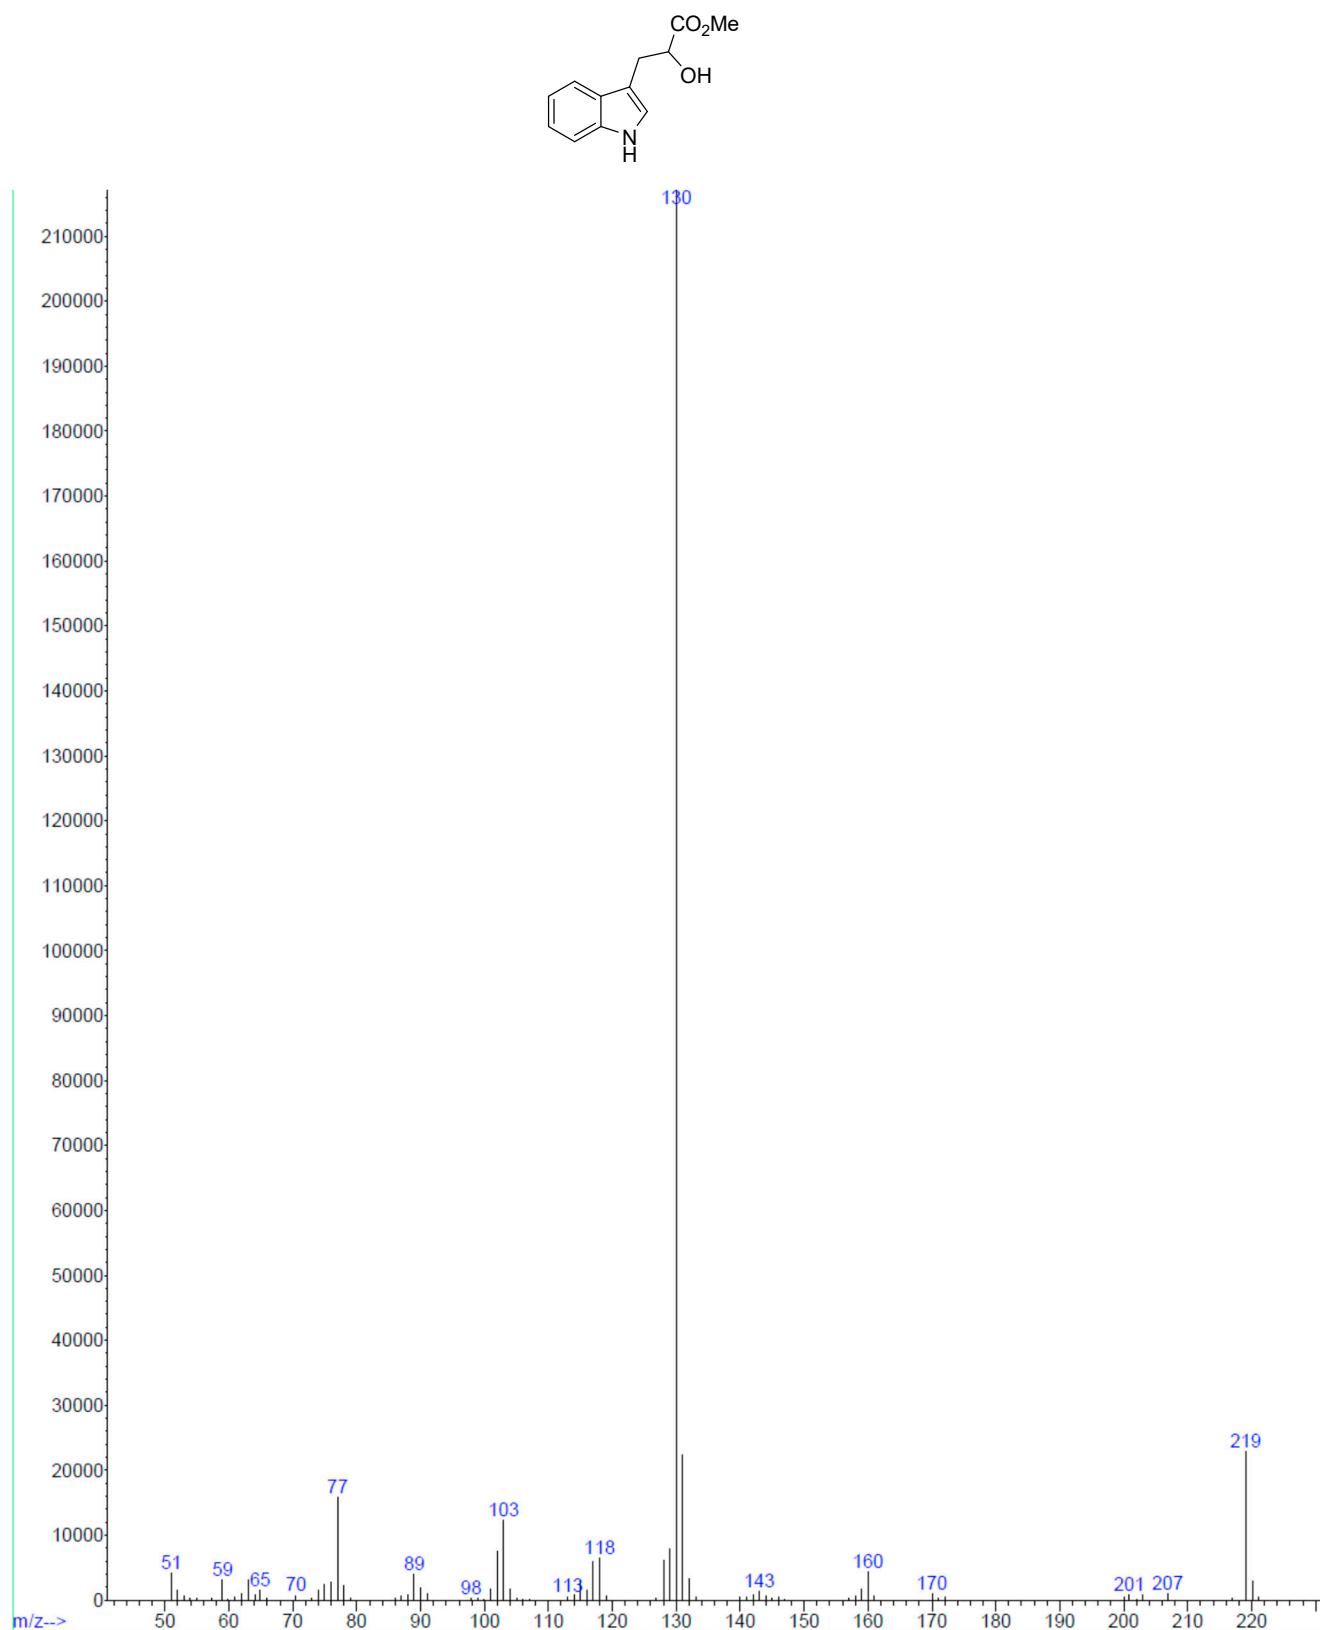



Figure S9

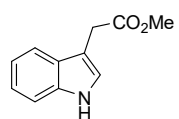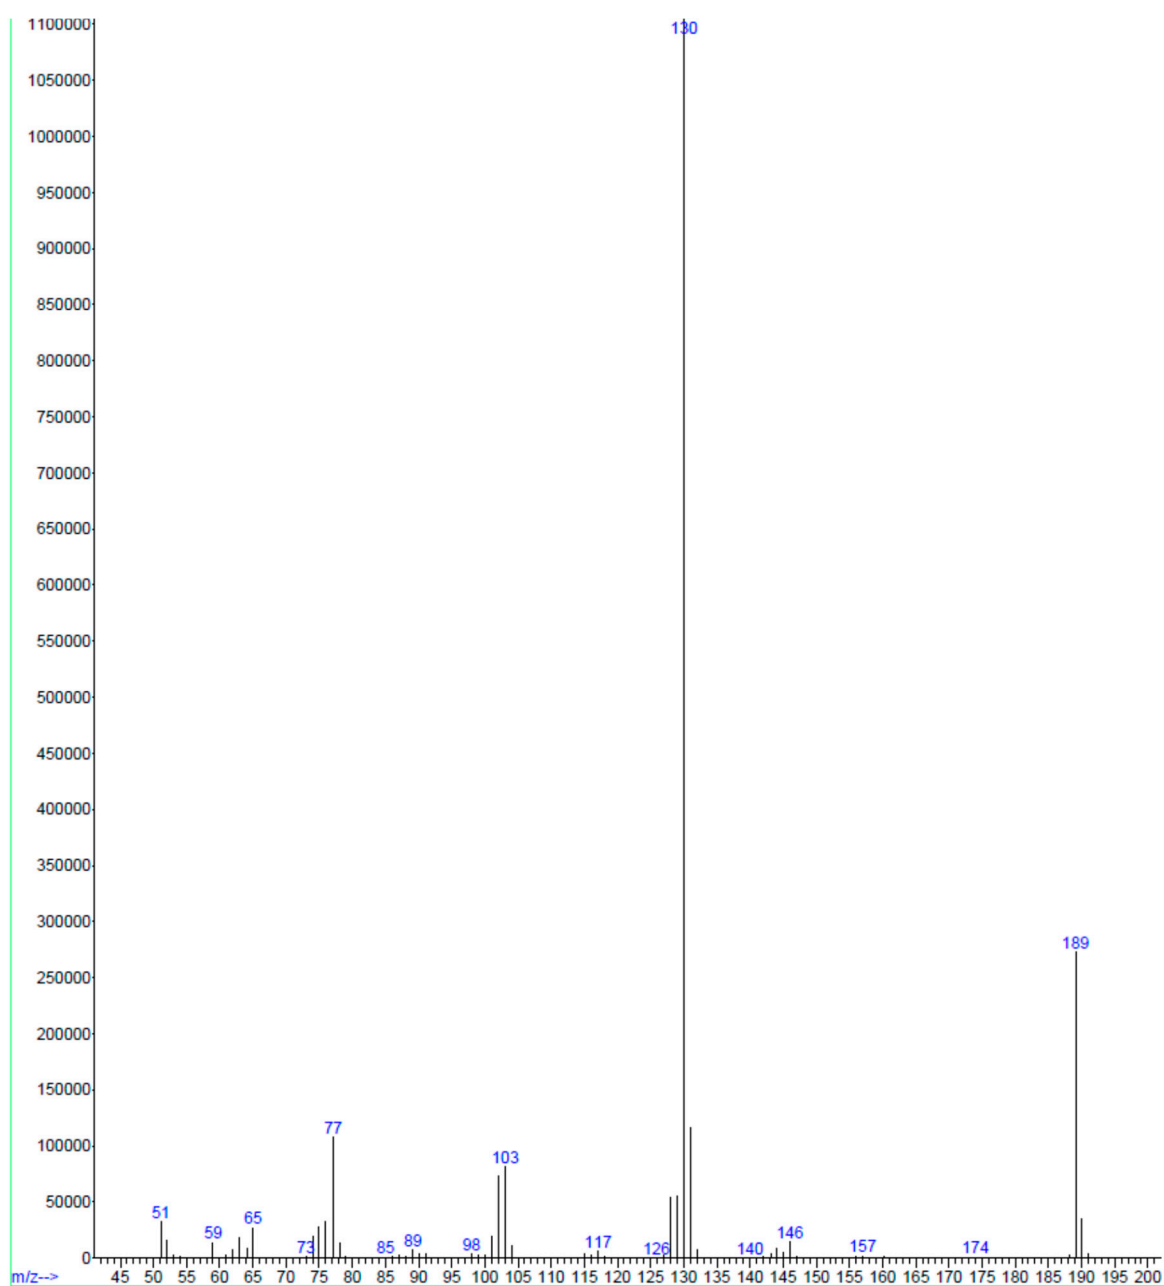

Supplement: s1 [file s1]
